# Supplementary material for: Using HPLC–MS/MS to Assess the Quality of Beet, Mizuna, Lettuce and Corn Salad after Juglone and Walnut Leaf Extract Treatments
Source: MDPI journal article supplement (doi:10.3390/agronomy12020347), 2022-01-29
Supplement: s1 [file s1]

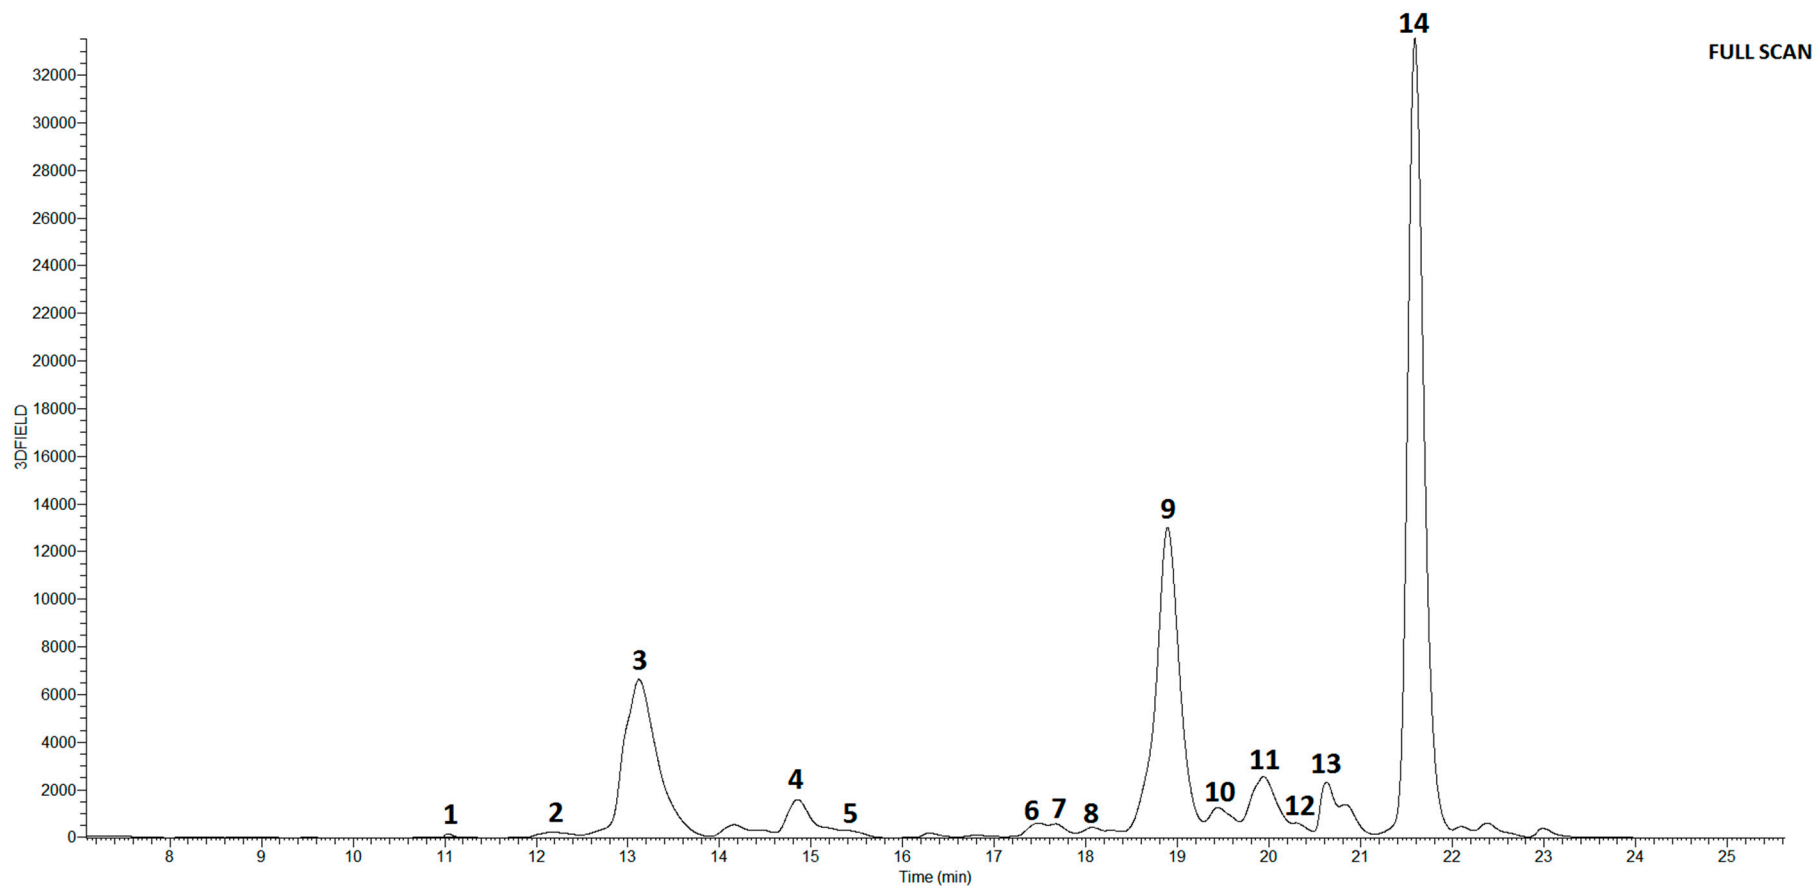

**Figure S1.** Representative full scan for the HPLC–MS analysis, and identification of the phenolic compounds for *Beta vulgaris* L.. **1**, *p*-coumaroylcaffeic acid; **2**, *p*-coumaric acid hexoside; **3**, ferulic acid hexoside; **4**, vitexin hexoside; **5**, ferulic acid; **6**, ferulic acid derivative 1; **7**, ferulic acid derivative 2; **8**, vitexin hexoside; **9**, luteolin dihexoside and vitexin pentoside; **10**, vitexin (apigenin-C-hexoside isomer); **11**, isorhamnetin dihexoside; **12**, vitexin hexoside derivative; **13**, isorhamnetin rutinoside; **14**, malonyl pentosylvitexin.

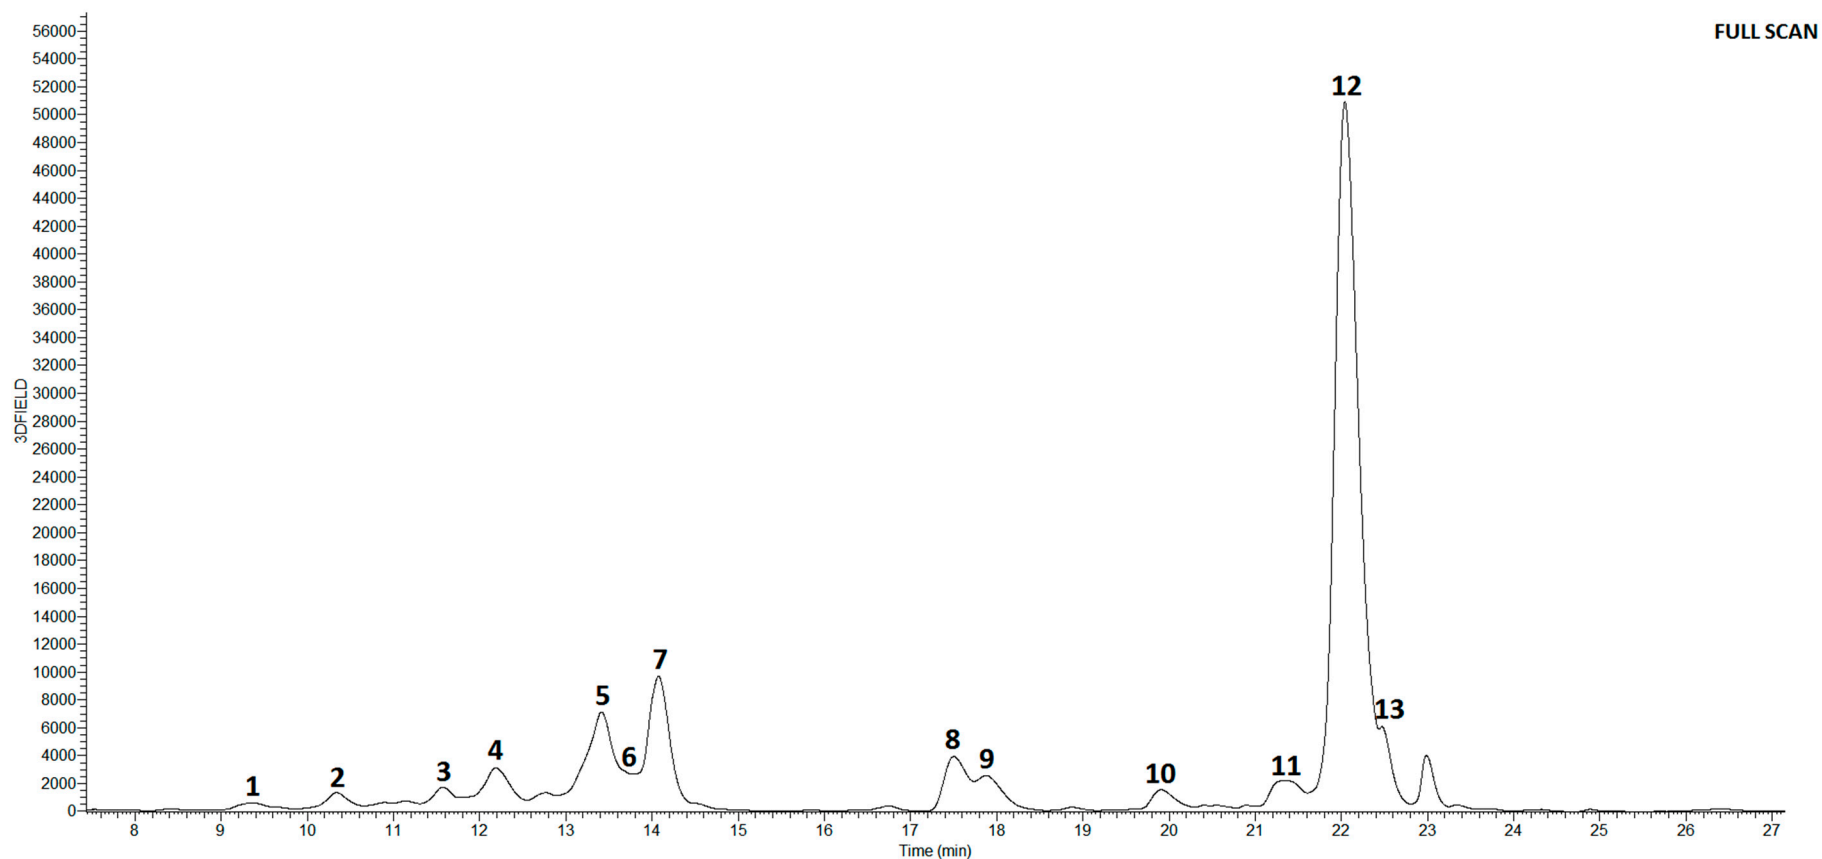

**Figure S2.** Representative full scan for the HPLC–MS, and identification of the phenolic compounds for *Brassica rapa* L. var. *japonica*. **1**, neochlorogenic acid (3-caffeoylquinic acid); **2**, kaempferol-3-*O*-diglucoside-7-*O*-glucoside; **3**, gluconapin; **4**, kaempferol-3-*O*-caffeoyldiglucoside-7-*O*-glucoside; **5**, kaempferol-3-*O*-sinapoyldiglucoside-7-*O*-glucoside and sinapoylglycoside; **6**, kaempferol diglucoside; **7**, kaempferol-3-*O*-feruoylglycoside-7-*O*-glucoside and isorhamnetin-3-*O*-glucoside-7-*O*-glucoside; **8**, caffeoylmalate; **9**, hydroxyferuoylmalate; **10**, kaempferol hexoside derivative; **11**, coumaroylmalate; **12**, sinapoylmalate; **13**, feruloylmalate.

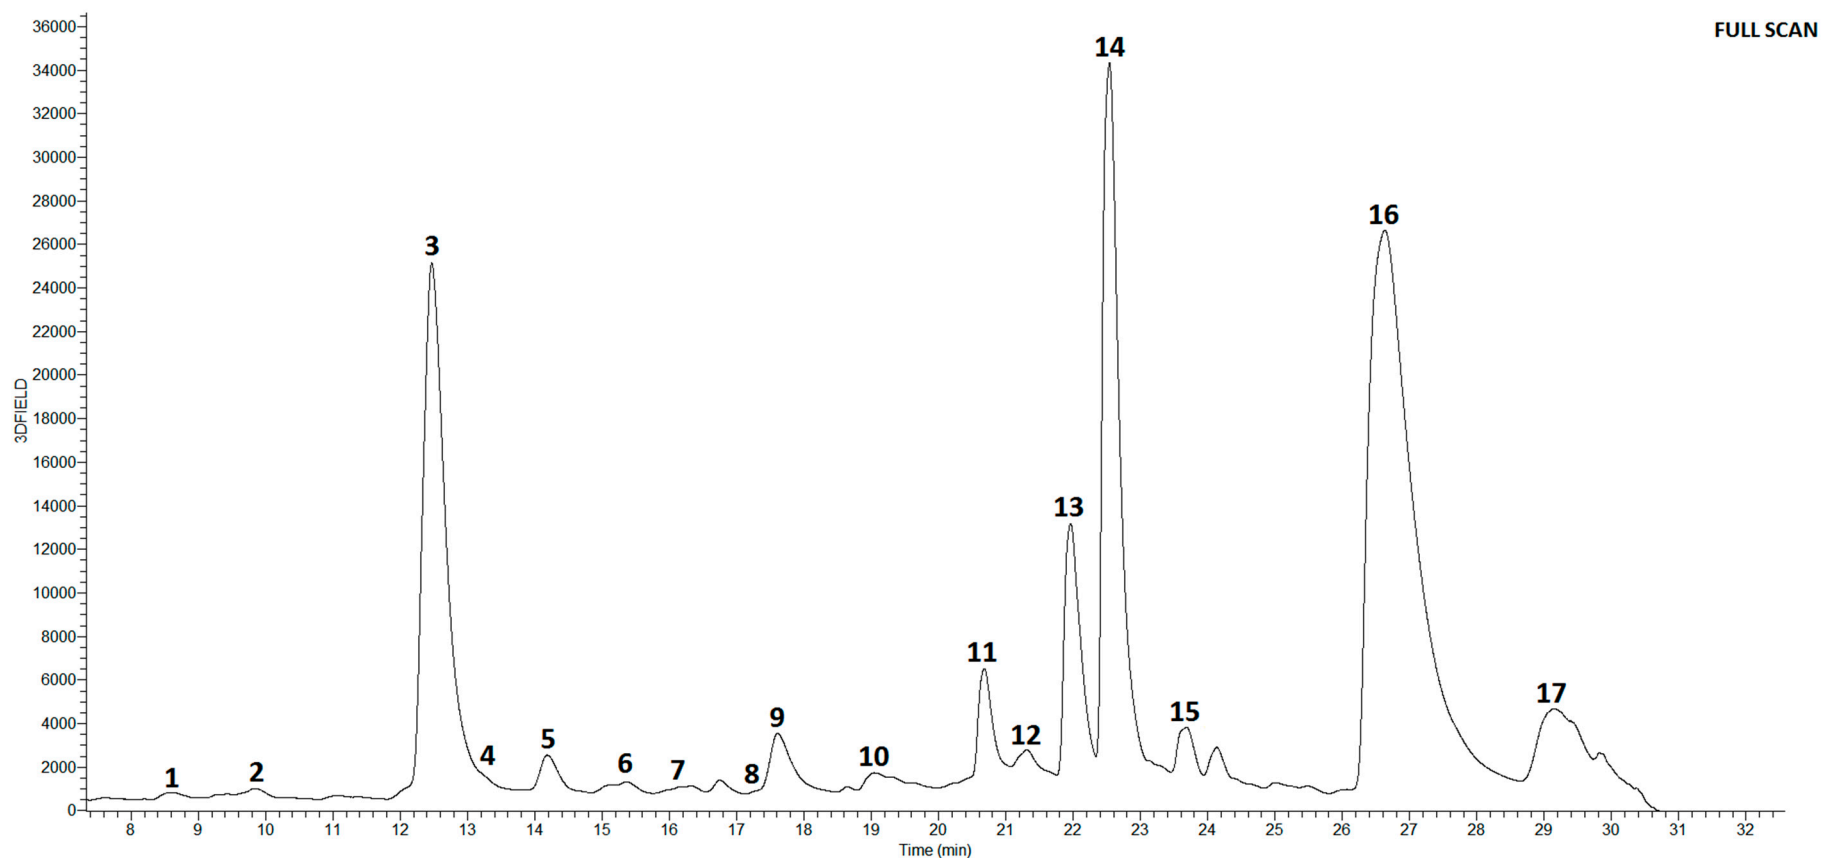

**Figure S3.** Representative full scan for the HPLC–MS, and identification of the phenolic compounds for *Lactuca sativa* L. **1**, dihydroxybenzoic acid hexoside; **2**, esculetin glucoside; **3**, chlorogenic acid (5-caffeoylquinic acid); **4**, galloyl hexoside; **5**, cryptochlorogenic acid (4-caffeoylquinic acid); **6**, synapoyl hexoside derivative; **7**, *p*-coumaroylquinic acid 1; **8**, *p*-coumaroylquinic acid 2; **9**, caffeoylmalic acid; **10**, quercetin-3-*O*-galactoside; **11**, quercetin-3-*O*-glucoside; **12**, kaempferol-3-*O*-glucuronoside; **13**, quercetin-3-*O*-glucuronide; **14**, quercetin 3-(6"-malonylglucoside); **15**, quercetin-3-(6"-acetylglucoside); **16**, caffeoyltartaric acid hexoside 1; **17**, caffeoyltartaric acid hexoside 2.

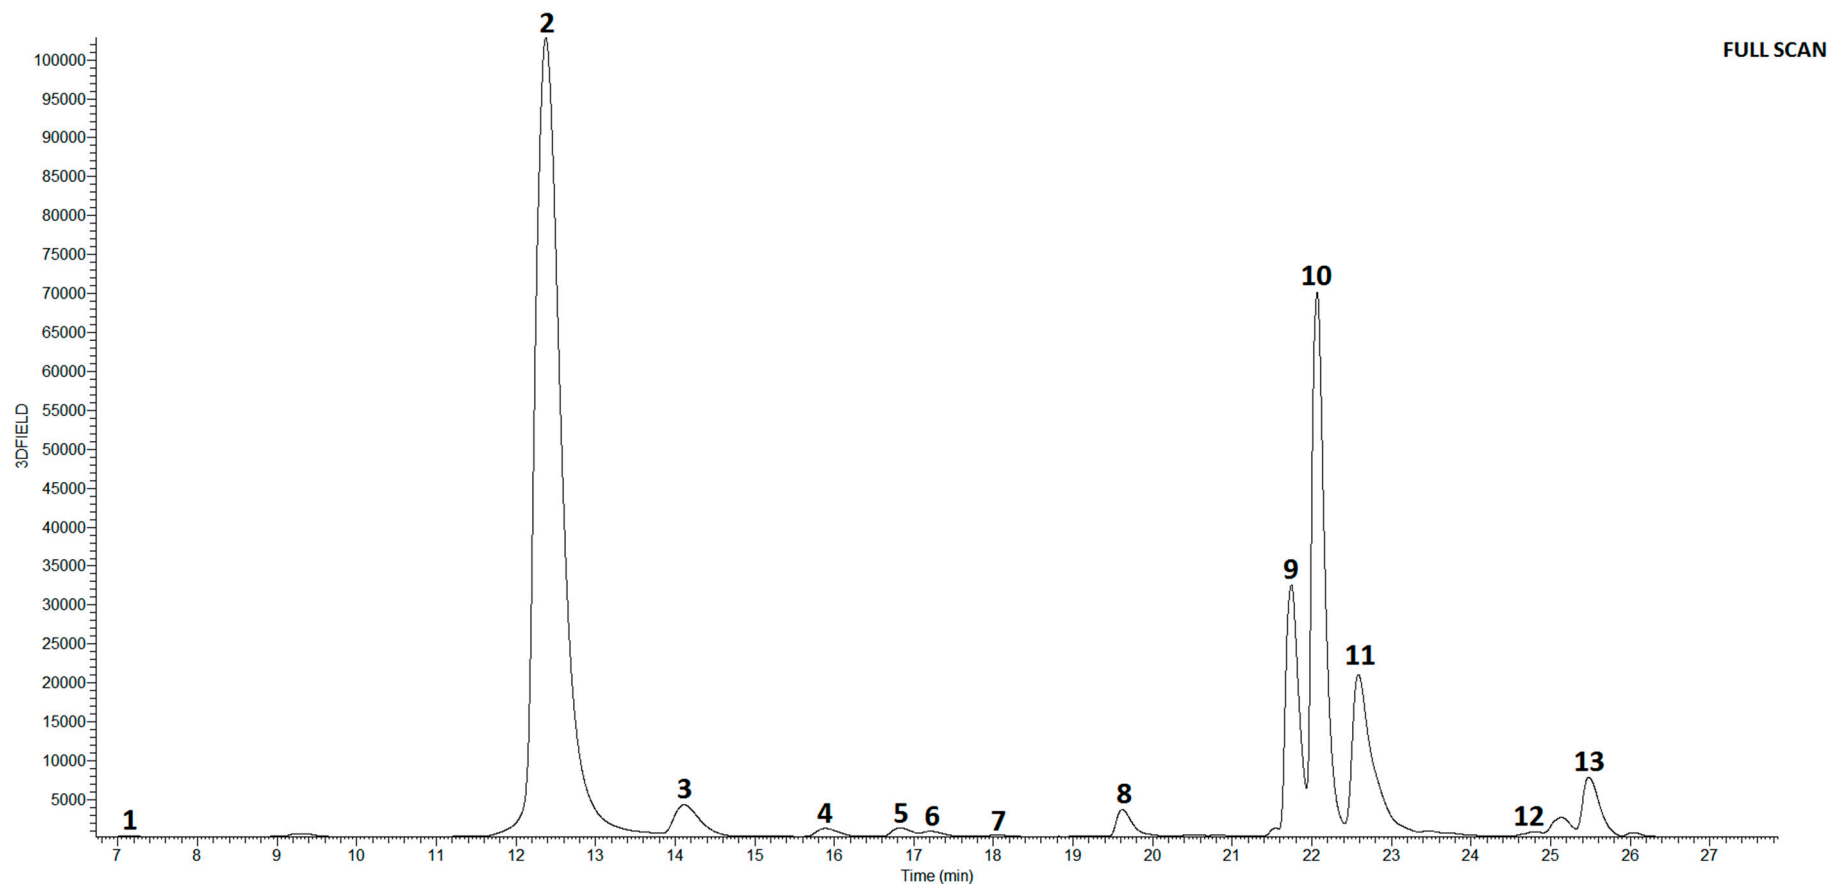

**Figure S4.** Representative full scan for the HPLC–MS, and identification of the phenolic compounds for *Valerianella locusta* Laterr. **1**, 4-hydroxyphenylaoyl glucoside derivative; **2**, chlorogenic acid (5-caffeoylquinic acid); **3**, cryptochlorogenic acid (4-caffeoylquinic acid); **4**, *cis* 5-*O-p*-coumaroylquinic acid; **5**, *cis* 5-*O*-feruoylquinic acid; **6**, *trans* 5-*O-p*-coumaroylquinic acid; **7**, *trans* 5-*O*-feruoylquinic acid; **8**, luteolin-7-rutinoside; **9**, diosmetin apiosylglucoside; **10**, diosmin (diosmetin-7-*O*-rutinoside); **11**, dicaffeoylquinic acid; **12**, apigenin-rutinoside; **13**, caffeic acid hexoside derivative.

**Table S1.** Yields for the different crop vegetables in terms of leaf fresh weight and dry matter, and root dry weight.

| Measure                            | Crop vegetable                               | Treatment         |                  |                  |                   |                   |
|------------------------------------|----------------------------------------------|-------------------|------------------|------------------|-------------------|-------------------|
|                                    |                                              | Controls          |                  | Control juglone  |                   | Leaf juglone      |
|                                    |                                              | K1                | K2               | 1 mM             | 10 $\mu$ M        | 10 $\mu$ M        |
| Leaf fresh weight (g/plant)        | <i>Beta vulgaris</i> L.                      | 17.7 $\pm$ 3.7 b  | 31.0 $\pm$ 3.2 c | 13.3 $\pm$ 3.2 a | 18.5 $\pm$ 4.0 b  | 22.0 $\pm$ 1.6 b  |
|                                    | <i>Brassica rapa</i> L. var. <i>japonica</i> | 47.7 $\pm$ 1.9 b  | 51.2 $\pm$ 5.7 b | 23.9 $\pm$ 1.8 a | 28.0 $\pm$ 1.3 a  | 66.8 $\pm$ 4.8 c  |
|                                    | <i>Lactuca sativa</i> L.                     | 25.1 $\pm$ 1.4 b  | 27.3 $\pm$ 2.0 b | 14.5 $\pm$ 3.9 a | 23.0 $\pm$ 2.1 b  | 48.4 $\pm$ 8.4 c  |
|                                    | <i>Valerianella locusta</i> Laterr.          | 9.8 $\pm$ 0.7 ab  | 12.8 $\pm$ 0.5 c | 9.3 $\pm$ 0.9 a  | 9.2 $\pm$ 0.6 a   | 12.2 $\pm$ 0.5 bc |
| Leaf dry matter (%/plant)          | <i>Beta vulgaris</i> L.                      | 34.0 $\pm$ 3.9 b  | 24.0 $\pm$ 1.5 a | 46.1 $\pm$ 7.7 c | 35.7 $\pm$ 4.0 b  | 29.7 $\pm$ 1.6 ab |
|                                    | <i>Brassica rapa</i> L. var. <i>japonica</i> | 17.8 $\pm$ 0.4 a  | 17.6 $\pm$ 1.0 a | 28.6 $\pm$ 1.2 b | 25.9 $\pm$ 0.6 b  | 14.7 $\pm$ 0.5 a  |
|                                    | <i>Lactuca sativa</i> L.                     | 25.7 $\pm$ 1.1 a  | 24.2 $\pm$ 1.3 a | 45.3 $\pm$ 7.0 b | 30.0 $\pm$ 2.1 ab | 16.9 $\pm$ 1.8 a  |
|                                    | <i>Valerianella locusta</i> Laterr.          | 52.6 $\pm$ 1.8 ab | 42.8 $\pm$ 1.3 a | 56.0 $\pm$ 4.1 b | 57.5 $\pm$ 3.3 b  | 44.8 $\pm$ 1.5 a  |
| Root dry weight (g/overall plants) | <i>Beta vulgaris</i> L.                      | 0.08              | 0.10             | 0.02             | 0.05              | 0.13              |
|                                    | <i>Brassica rapa</i> L. var. <i>japonica</i> | 0.12              | 0.13             | 0.04             | 0.04              | 0.19              |
|                                    | <i>Lactuca sativa</i> L.                     | 0.17              | 0.15             | 0.02             | 0.08              | 0.35              |
|                                    | <i>Valerianella locusta</i> Laterr.          | 0.02              | 0.08             | 0.01             | 0.02              | 0.07              |

Data are means  $\pm$ standard error (where appropriate).

Means followed by different letters between different treatments (within rows) are significantly different (p <0.05).

K1: extraction medium control (0.17% DMSO, 0.17% ethanol in H<sub>2</sub>O); K2: water control.

**Table S2.** Individual phenolic compounds quantified in *Beta vulgaris* L.

| Phenolic compound                    | Quantification according to treatment (mg/kg dry weight) |                       |                       |                       |                         |                       |                       |                         |                      |
|--------------------------------------|----------------------------------------------------------|-----------------------|-----------------------|-----------------------|-------------------------|-----------------------|-----------------------|-------------------------|----------------------|
|                                      | Control juglone                                          |                       |                       |                       |                         |                       | Leaf juglone          |                         |                      |
|                                      | 1 mM                                                     |                       |                       | 10 $\mu$ M            |                         |                       | 10 $\mu$ M            |                         |                      |
|                                      | Young leaves                                             | Semi-old leaves       | Old leaves            | Young leaves          | Semi-old leaves         | Old leaves            | Young leaves          | Semi-old leaves         | Old leaves           |
| <i>p</i> -Coumaroylcaffeic acid      | 15.4 $\pm$ 3.0 ab                                        | 2.9 $\pm$ 1.8 ab      | 19.4 $\pm$ 5.5 ab     | 9.1 $\pm$ 3.3 ab      | 0.3 $\pm$ 0.1 a         | 35.6 $\pm$ 12.4 b     | 6.1 $\pm$ 0.9 ab      | 10.6 $\pm$ 8.8 ab       | 16.5 $\pm$ 11.1 ab   |
| <i>p</i> -Coumaric acid hexoside     | 19.5 $\pm$ 0.2 b                                         | 11.3 $\pm$ 1.9 ab     | 8.2 $\pm$ 4.5 ab      | 12.3 $\pm$ 0.4 ab     | 1.6 $\pm$ 0.2 a         | 18.5 $\pm$ 5.4 b      | 9.9 $\pm$ 0.6 ab      | 7.2 $\pm$ 5.2 ab        | 7.7 $\pm$ 4.7 ab     |
| Ferulic acid hexoside 1              | 81.2 $\pm$ 1.6 bc                                        | 94.9 $\pm$ 2.7 cd     | 135.8 $\pm$ 3.9 de    | 36.7 $\pm$ 1.0 ab     | 57.8 $\pm$ 2.8 ac       | 271.3 $\pm$ 7.2 h     | 23.6 $\pm$ 7.7 a      | 181.8 $\pm$ 16.9 ef     | 199.3 $\pm$ 4.9 fg   |
| Vitexin hexoside 1                   | 14.7 $\pm$ 3.1 ab                                        | 15.0 $\pm$ 2.2 ab     | 2.3 $\pm$ 0.8 a       | 27.3 $\pm$ 4.5 ac     | 76.0 $\pm$ 10.7 de      | 93.9 $\pm$ 1.2 e      | 33.2 $\pm$ 8.0 acd    | 40.2 $\pm$ 6.9 acd      | 49.5 $\pm$ 7.4 bcd   |
| Ferulic acid                         | 0.6 $\pm$ 0.2 a                                          | 0.2 $\pm$ 0.0 a       | 0.7 $\pm$ 0.3 a       | 13.5 $\pm$ 0.2 ac     | 22.8 $\pm$ 2.1 bc       | 7.2 $\pm$ 2.2 ab      | 76.9 $\pm$ 6.8 f      | 32.2 $\pm$ 1.1 cd       | 16.2 $\pm$ 0.8 ac    |
| Ferulic acid derivative 1            | 102.2 $\pm$ 11.5 df                                      | 95.8 $\pm$ 7.3 cf     | 150.1 $\pm$ 11.8 g    | 120.1 $\pm$ 11.8 efg  | 54.1 $\pm$ 11.1 ab      | 112.3 $\pm$ 3.6 dfg   | 59.1 $\pm$ 5.9 ac     | 77.7 $\pm$ 4.3 bcd      | 20.5 $\pm$ 4.3 a     |
| Ferulic acid derivative 2            | 123.8 $\pm$ 2.6 ef                                       | 82.8 $\pm$ 2.1 bc     | 136.2 $\pm$ 3.6 f     | 104.3 $\pm$ 5.4 ce    | 43.7 $\pm$ 4.5 a        | 130.5 $\pm$ 6.4 ef    | 67.3 $\pm$ 1.6 ab     | 80.9 $\pm$ 3.6 bc       | 41.2 $\pm$ 8.9 a     |
| Vitexin hexoside 2                   | 428.7 $\pm$ 10.0 fh                                      | 430.2 $\pm$ 31.8 fh   | 524.8 $\pm$ 18.3 h    | 427.6 $\pm$ 28.6 fg   | 239.0 $\pm$ 14.8 bc     | 330.6 $\pm$ 3.9 cde   | 356.4 $\pm$ 26.6 df   | 301.1 $\pm$ 6.4 cde     | 88.2 $\pm$ 25.2 a    |
| Vitexin pentoside                    | 1204.8 $\pm$ 23.9 ef                                     | 1103.7 $\pm$ 33.0 de  | 1429.4 $\pm$ 25.3 g   | 1093.0 $\pm$ 43.6 de  | 696.8 $\pm$ 41.7 b      | 812.4 $\pm$ 14.8 bc   | 676.4 $\pm$ 66.4 b    | 698.1 $\pm$ 24.9 b      | 306.8 $\pm$ 21.5 a   |
| Luteolin dihexoside                  | 1246.4 $\pm$ 24.7 ef                                     | 1141.8 $\pm$ 34.1 de  | 1478.7 $\pm$ 26.1 g   | 1130.8 $\pm$ 45.1 de  | 720.8 $\pm$ 43.1 b      | 840.5 $\pm$ 15.3 bc   | 699.8 $\pm$ 68.7 b    | 722.1 $\pm$ 25.7 b      | 317.4 $\pm$ 22.3 a   |
| Vitexin (apigenin-C-hexoside isomer) | 156.9 $\pm$ 2.6 de                                       | 155.5 $\pm$ 8.3 de    | 86.7 $\pm$ 10.0 bc    | 192.1 $\pm$ 5.9 e     | 323.0 $\pm$ 17.3 f      | 39.5 $\pm$ 6.3 ab     | 410.0 $\pm$ 22.8 g    | 160.8 $\pm$ 8.8 de      | 27.1 $\pm$ 8.6 a     |
| Isorhamnetin dihexoside              | 255.5 $\pm$ 4.2 ce                                       | 292.1 $\pm$ 14.7 e    | 174.1 $\pm$ 22.9 b    | 175.5 $\pm$ 3.9 b     | 583.2 $\pm$ 11.5 f      | 66.3 $\pm$ 14.0 a     | 242.0 $\pm$ 8.9 ce    | 171.3 $\pm$ 21.1 b      | 19.9 $\pm$ 4.3 a     |
| Vitexin hexoside derivative          | 126.4 $\pm$ 4.0 be                                       | 184.2 $\pm$ 18.4 ef   | 100.8 $\pm$ 4.6 abc   | 115.5 $\pm$ 4.7 bd    | 161.5 $\pm$ 9.4 cde     | 242.6 $\pm$ 25.9 f    | 132.7 $\pm$ 19.2 be   | 99.4 $\pm$ 13.6 ab      | 46.7 $\pm$ 11.7 a    |
| Isorhamnetin rutinoside              | 145.7 $\pm$ 2.1 ab                                       | 422.0 $\pm$ 35.3 de   | 194.6 $\pm$ 19.0 ac   | 189.3 $\pm$ 8.4 ac    | 110.1 $\pm$ 9.1 a       | 266.1 $\pm$ 18.4 c    | 365.5 $\pm$ 20.5 d    | 437.3 $\pm$ 30.5 df     | 132.8 $\pm$ 18.2 a   |
| Malonyl pentosylvitexin              | 3278.3 $\pm$ 59.0 ce                                     | 3634.3 $\pm$ 132.1 ef | 1285.3 $\pm$ 35.7 a   | 6208.6 $\pm$ 309.5 h  | 3388.6 $\pm$ 258.3 de   | 2523.8 $\pm$ 41.5 bcd | 4975.3 $\pm$ 456.7 g  | 3658.1 $\pm$ 120.0 ef   | 1369.4 $\pm$ 13.9 a  |
| <b>Total hydroxycinnamic acids</b>   | 342.6 $\pm$ 9.8 bcd                                      | 287.8 $\pm$ 4.5 ac    | 450.4 $\pm$ 23.8 def  | 296.0 $\pm$ 16.4 bc   | 180.2 $\pm$ 7.1 a       | 575.4 $\pm$ 30.1 h    | 242.9 $\pm$ 15.9 ab   | 390.3 $\pm$ 18.6 ce     | 301.5 $\pm$ 24.0 bc  |
| <b>Total flavonols</b>               | 401.2 $\pm$ 5.4 cd                                       | 714.2 $\pm$ 49.1 fg   | 368.6 $\pm$ 41.8 c    | 364.8 $\pm$ 11.2 c    | 693.3 $\pm$ 17.3 fg     | 332.5 $\pm$ 29.2 bc   | 607.5 $\pm$ 24.6 ef   | 608.6 $\pm$ 16.0 ef     | 152.6 $\pm$ 22.5 a   |
| <b>Total flavones</b>                | 6456.2 $\pm$ 106.1 eg                                    | 6664.7 $\pm$ 239.4 fg | 4907.9 $\pm$ 96.9 cde | 9194.9 $\pm$ 427.6 h  | 5605.7 $\pm$ 367.7 cdef | 4883.3 $\pm$ 65.0 cd  | 7283.8 $\pm$ 654.2 g  | 5679.9 $\pm$ 177.3 cdef | 2205.1 $\pm$ 100.0 a |
| <b>TAPC</b>                          | 7200.0 $\pm$ 115.1 df                                    | 7666.7 $\pm$ 259.8 ef | 5727.0 $\pm$ 152.9 cd | 9855.6 $\pm$ 451.6 gh | 6479.2 $\pm$ 382.0 cde  | 5791.1 $\pm$ 122.9 cd | 8134.2 $\pm$ 677.2 ef | 6678.8 $\pm$ 200.1 cf   | 2659.2 $\pm$ 142.2 a |
|                                      | <b>K1</b>                                                |                       |                       | <b>K2</b>             |                         |                       |                       |                         |                      |
| <i>p</i> -Coumaroylcaffeic acid      | 5.9 $\pm$ 1.7 ab                                         | 0.6 $\pm$ 0.2 a       | 27.0 $\pm$ 2.4 ab     | 12.1 $\pm$ 1.7 ab     | 13.4 $\pm$ 5.2 ab       | 34.6 $\pm$ 15.8 b     |                       |                         |                      |
| <i>p</i> -Coumaric acid hexoside     | 10.9 $\pm$ 0.4 ab                                        | 1.9 $\pm$ 0.6 a       | 14.7 $\pm$ 1.8 ab     | 12.1 $\pm$ 0.2 ab     | 5.7 $\pm$ 2.0 ab        | 14.9 $\pm$ 5.7 ab     |                       |                         |                      |
| Ferulic acid hexoside 1              | 23.1 $\pm$ 6.8 a                                         | 98.1 $\pm$ 3.0 cd     | 202.5 $\pm$ 6.5 fg    | 97.9 $\pm$ 23.4 cd    | 219.8 $\pm$ 8.6 fg      | 239.9 $\pm$ 10.4 gh   |                       |                         |                      |
| Vitexin hexoside 1                   | 65.7 $\pm$ 16.3 ce                                       | 23.6 $\pm$ 1.6 ac     | 47.5 $\pm$ 7.0 bcd    | 72.9 $\pm$ 21.0 de    | 24.4 $\pm$ 8.5 ac       | 8.9 $\pm$ 2.2 ab      |                       |                         |                      |
| Ferulic acid                         | 169.6 $\pm$ 9.1 h                                        | 62.2 $\pm$ 2.7 ef     | 49.0 $\pm$ 3.2 de     | 194.9 $\pm$ 9.5 i     | 101.3 $\pm$ 4.5 g       | 16.8 $\pm$ 0.2 ac     |                       |                         |                      |
| Ferulic acid derivative 1            | 103.7 $\pm$ 10.7 df                                      | 111.6 $\pm$ 7.2 dfg   | 81.0 $\pm$ 9.0 bcde   | 85.4 $\pm$ 2.2 bcf    | 123.7 $\pm$ 6.7fg       | 60.0 $\pm$ 1.2 ac     |                       |                         |                      |
| Ferulic acid derivative 2            | 80.5 $\pm$ 10.9 bc                                       | 116.5 $\pm$ 6.4 def   | 89.2 $\pm$ 3.0 bc     | 139.3 $\pm$ 5.9 f     | 95.7 $\pm$ 4.1 cd       | 52.1 $\pm$ 0.7 a      |                       |                         |                      |
| Vitexin hexoside 2                   | 307.7 $\pm$ 25.2 cde                                     | 382.9 $\pm$ 12.7 ef   | 279.7 $\pm$ 7.3 cd    | 671.3 $\pm$ 3.7 i     | 489.2 $\pm$ 25.6 gh     | 168.5 $\pm$ 8.0 ab    |                       |                         |                      |
| Vitexin pentoside                    | 794.9 $\pm$ 41.3 bc                                      | 924.6 $\pm$ 31.5 cd   | 695.0 $\pm$ 7.4 b     | 1373.6 $\pm$ 25.5 fg  | 1129.7 $\pm$ 61.7 e     | 479.7 $\pm$ 9.5 a     |                       |                         |                      |
| Luteolin dihexoside                  | 822.3 $\pm$ 42.7 bc                                      | 956.5 $\pm$ 32.6 cd   | 719.0 $\pm$ 7.6 b     | 1421.0 $\pm$ 26.4 fg  | 1168.7 $\pm$ 63.9 e     | 496.3 $\pm$ 9.8 a     |                       |                         |                      |
| Vitexin (apigenin-C-hexoside isomer) | 199.9 $\pm$ 6.4 e                                        | 188.7 $\pm$ 10.9 e    | 127.2 $\pm$ 17.9 cd   | 524.4 $\pm$ 15.8 h    | 103.3 $\pm$ 4.7 cd      | 39.9 $\pm$ 7.2 ab     |                       |                         |                      |

|                                    |                   |                   |                  |                   |                   |                  |
|------------------------------------|-------------------|-------------------|------------------|-------------------|-------------------|------------------|
| Isorhamnetin dihexoside            | 278.2 ± 12.1 de   | 206.2 ± 4.3 bc    | 224.4 ± 11.4 bcd | 261.3 ± 4.3 ce    | 302.6 ± 17.4 e    | 67.9 ± 14.3 a    |
| Vitexin hexoside derivative        | 118.3 ± 5.3 bd    | 165.4 ± 9.4 de    | 102.0 ± 5.5 abc  | 144.3 ± 9.0 be    | 167.7 ± 10.1 de   | 51.1 ± 7.0 a     |
| Isorhamnetin rutinoside            | 232.3 ± 21.3 bc   | 406.2 ± 24.3 de   | 197.0 ± 10.9 ac  | 521.4 ± 12.4 f    | 502.2 ± 15.8 ef   | 142.7 ± 18.6 ab  |
| Malonyl pentosylvitexin            | 4021.9 ± 230.5 eg | 4590.5 ± 180.4 fg | 2312.0 ± 4.7 ac  | 9171.1 ± 207.0 i  | 6251.5 ± 340.4 h  | 1853.0 ± 25.9 ab |
| <b>Total hydroxycinnamic acids</b> | 393.8 ± 24.7 ce   | 390.9 ± 15.0 ce   | 463.3 ± 9.1 eg   | 541.8 ± 35.9 fgh  | 559.5 ± 22.1 gh   | 418.3 ± 32.3 de  |
| <b>Total flavonols</b>             | 510.4 ± 25.4 de   | 612.4 ± 25.4 ef   | 421.3 ± 21.3 cd  | 782.8 ± 14.2 g    | 804.9 ± 32.8 g    | 210.6 ± 12.4 ab  |
| <b>Total flavones</b>              | 6330.7 ± 346.5 dg | 7232.1 ± 264.2 g  | 4282.4 ± 13.1 bc | 13378.7 ± 292.2 i | 9334.5 ± 500.2 h  | 3097.5 ± 35.4 ab |
| <b>TAPC</b>                        | 7234.9 ± 380.8 df | 8235.4 ± 297.8 fg | 5167.0 ± 37.8 bc | 14703.3 ± 331.2 i | 10698.8 ± 554.0 h | 3726.4 ± 56.5 ab |

Data are means ±standard error.

Means followed by different letters within rows are significantly different (p <0.05).

TAPC, total analysed phenolics content.

K1: extraction medium control (0.17% DMSO, 0.17% ethanol in H<sub>2</sub>O); K2: water control.

Young leaves, undeveloped leaves; semi-old leaves, remaining fully developed leaves; old leaves, four outer fully developed leaves.

**Table S3.** Individual compounds quantified in *Brassica rapa* L. var. *japonica*.

| Phenolic compound                                | Quantification according to treatment (mg/kg dry weight) |                        |                      |                       |                       |                      |                      |                     |                     |
|--------------------------------------------------|----------------------------------------------------------|------------------------|----------------------|-----------------------|-----------------------|----------------------|----------------------|---------------------|---------------------|
|                                                  | Control juglone                                          |                        |                      |                       |                       |                      | Leaf juglone         |                     |                     |
|                                                  | 1 mM                                                     |                        |                      | 10 $\mu$ M            |                       |                      | 10 $\mu$ M           |                     |                     |
|                                                  | Young leaves                                             | Semi-old leaves        | Old leaves           | Young leaves          | Semi-old leaves       | Old leaves           | Young leaves         | Semi-old leaves     | Old leaves          |
| Neochlorogenic acid (3-caffeoylquinic acid)      | 335.3 $\pm$ 47.1 e                                       | 146.9 $\pm$ 12.1 bc    | 7.6 $\pm$ 1.5 a      | 172.4 $\pm$ 23.9 c    | 42.4 $\pm$ 21.6 a     | 11.1 $\pm$ 0.4 a     | 81.7 $\pm$ 16.8 ab   | 16.1 $\pm$ 8.5 a    | 10.5 $\pm$ 1.5 a    |
| Kaempferol-3-O-diglucoside-7-O-glucoside         | 464.8 $\pm$ 16.3 h                                       | 279.3 $\pm$ 13.0 efg   | 122.8 $\pm$ 11.7 ab  | 288.0 $\pm$ 23.4 g    | 206.4 $\pm$ 21.2 cde  | 78.1 $\pm$ 2.8 a     | 224.6 $\pm$ 11.3 cdg | 163.4 $\pm$ 15.3 bc | 109.2 $\pm$ 13.0 ab |
| Gluconapin                                       | 225.6 $\pm$ 8.5 fg                                       | 201.1 $\pm$ 5.0 ef     | 70.2 $\pm$ 5.2 ab    | 235.7 $\pm$ 12.2 fg   | 161.7 $\pm$ 18.9 de   | 77.7 $\pm$ 2.8 ac    | 197.5 $\pm$ 5.1 ef   | 109.3 $\pm$ 11.2 bc | 84.8 $\pm$ 6.3 ac   |
| Kaempferol-3-O-caffeoyldiglucoside-7-O-glucoside | 785.2 $\pm$ 18.4 f                                       | 611.1 $\pm$ 14.5 e     | 322.5 $\pm$ 12.3 b   | 598.8 $\pm$ 18.2 de   | 528.3 $\pm$ 26.3 ce   | 264.3 $\pm$ 12.9 ab  | 715.8 $\pm$ 13.8 f   | 457.5 $\pm$ 17.7 c  | 326.6 $\pm$ 8.5 b   |
| Kaempferol-3-O-sinapoyldiglucoside-7-O-glucoside | 492.9 $\pm$ 15.2 f                                       | 311.8 $\pm$ 21.2 de    | 181.7 $\pm$ 2.7 acd  | 191.4 $\pm$ 65.9 acd  | 140.0 $\pm$ 60.4 ac   | 47.9 $\pm$ 4.2 a     | 298.4 $\pm$ 56.4 de  | 177.5 $\pm$ 8.0 acd | 197.3 $\pm$ 5.4 bce |
| Kaempferol diglucoside                           | 77.8 $\pm$ 2.1 j                                         | 43.1 $\pm$ 0.3 g       | 10.4 $\pm$ 0.3 ab    | 55.9 $\pm$ 2.0 hi     | 39.1 $\pm$ 2.1 fg     | 14.9 $\pm$ 0.6 bc    | 50.9 $\pm$ 1.2 h     | 21.8 $\pm$ 0.7 d    | 13.7 $\pm$ 0.6 ac   |
| Sinapoylglycoside                                | 39.1 $\pm$ 1.1 j                                         | 21.7 $\pm$ 0.2 g       | 5.2 $\pm$ 0.2 ab     | 28.1 $\pm$ 1.0 hi     | 19.7 $\pm$ 1.1 fg     | 7.5 $\pm$ 0.3 bc     | 25.6 $\pm$ 0.6 h     | 10.9 $\pm$ 0.4 d    | 6.9 $\pm$ 0.3 ac    |
| Isorhamnetin-3-O-glucoside-7-O-glucoside         | 170.6 $\pm$ 5.5 i                                        | 118.9 $\pm$ 3.7 h      | 54.4 $\pm$ 1.3 bc    | 77.7 $\pm$ 2.0 ef     | 76.0 $\pm$ 4.4 df     | 47.2 $\pm$ 1.6 ab    | 92.4 $\pm$ 2.4 g     | 56.8 $\pm$ 2.0 bc   | 47.0 $\pm$ 0.6 ab   |
| Kaempferol-3-O-feruoylglycoside-7-O-glucoside    | 184.0 $\pm$ 5.9 i                                        | 128.3 $\pm$ 4.0 h      | 58.7 $\pm$ 1.4 bc    | 83.8 $\pm$ 2.1 ef     | 82.0 $\pm$ 4.7 df     | 50.9 $\pm$ 1.7 ab    | 99.7 $\pm$ 2.6 g     | 61.2 $\pm$ 2.2 bc   | 50.7 $\pm$ 0.7 ab   |
| Caffeoylmalate                                   | 49.9 $\pm$ 2.0 ab                                        | 167.9 $\pm$ 9.1 g      | 100.8 $\pm$ 5.5 e    | 43.5 $\pm$ 7.2 a      | 211.8 $\pm$ 11.9 h    | 139.3 $\pm$ 7.0 f    | 76.4 $\pm$ 2.7 bce   | 57.5 $\pm$ 1.3 ac   | 77.5 $\pm$ 2.6 ce   |
| Hydroxyferuoylmalate                             | 31.1 $\pm$ 0.6 bce                                       | 75.5 $\pm$ 5.0 g       | 37.2 $\pm$ 4.0 de    | 20.0 $\pm$ 3.1 ab     | 58.8 $\pm$ 7.6 f      | 39.9 $\pm$ 3.1 e     | 20.8 $\pm$ 0.5 ac    | 16.1 $\pm$ 1.3 a    | 21.9 $\pm$ 0.5 acd  |
| Kaempferol hexoside derivative                   | 56.3 $\pm$ 2.4 cd                                        | 55.4 $\pm$ 0.4 cd      | 97.3 $\pm$ 15.3 e    | 38.1 $\pm$ 4.3 ad     | 18.5 $\pm$ 6.2 ab     | 27.6 $\pm$ 1.4 abc   | 47.5 $\pm$ 3.9 bd    | 11.0 $\pm$ 0.3 a    | 13.5 $\pm$ 0.8 ab   |
| Coumaroylmalate                                  | 189.2 $\pm$ 4.5 ce                                       | 400.9 $\pm$ 15.9 i     | 280.1 $\pm$ 6.8 gh   | 199.2 $\pm$ 5.5 e     | 371.7 $\pm$ 16.4 i    | 313.0 $\pm$ 13.4 h   | 253.2 $\pm$ 6.1 fg   | 96.9 $\pm$ 4.9 a    | 110.9 $\pm$ 6.1 ab  |
| Sinapoylmalate                                   | 837.4 $\pm$ 16.7 cd                                      | 1238.9 $\pm$ 52.7 f    | 728.5 $\pm$ 18.3 bc  | 846.4 $\pm$ 16.1 cd   | 1398.3 $\pm$ 51.6 g   | 903.5 $\pm$ 19.7 d   | 1106.7 $\pm$ 21.7 e  | 475.1 $\pm$ 12.9 a  | 657.2 $\pm$ 8.6 b   |
| Feruloylmalate                                   | 255.6 $\pm$ 7.1 i                                        | 98.8 $\pm$ 6.9 ef      | 125.6 $\pm$ 7.0 f    | 263.6 $\pm$ 13.8 i    | 87.0 $\pm$ 7.3 de     | 62.0 $\pm$ 4.3 cd    | 211.0 $\pm$ 3.0 gh   | 14.9 $\pm$ 0.4 a    | 32.1 $\pm$ 1.0 ab   |
| <b>Total hydroxycinnamic acids</b>               | 1738.5 $\pm$ 27.0 h                                      | 2150.5 $\pm$ 76.6 i    | 1285.0 $\pm$ 41.1 ef | 1573.2 $\pm$ 49.7 gh  | 2189.7 $\pm$ 111.3 i  | 1476.3 $\pm$ 44.9 fg | 1775.4 $\pm$ 27.4 h  | 687.5 $\pm$ 17.7 ab | 916.9 $\pm$ 19.4 bc |
| <b>Total flavonols</b>                           | 2231.7 $\pm$ 63.2 i                                      | 1547.9 $\pm$ 51.7 g    | 847.9 $\pm$ 40.0 cd  | 1333.7 $\pm$ 92.4 fg  | 1090.4 $\pm$ 73.8 def | 531.0 $\pm$ 24.3 ab  | 1529.2 $\pm$ 55.1 g  | 949.2 $\pm$ 44.8 ce | 758.0 $\pm$ 25.9 bc |
| <b>TAPC</b>                                      | 4195.7 $\pm$ 72.3 i                                      | 3899.5 $\pm$ 123.2 ghi | 2203.1 $\pm$ 80.3 bc | 3142.6 $\pm$ 146.3 ef | 3441.8 $\pm$ 186.9 fg | 2085.0 $\pm$ 71.7 bc | 3502.1 $\pm$ 71.5 fh | 1746.0 $\pm$ 70.8 b | 1759.8 $\pm$ 49.8 b |
|                                                  | <b>K1</b>                                                |                        |                      | <b>K2</b>             |                       |                      |                      |                     |                     |
| Neochlorogenic acid (3-caffeoylquinic acid)      | 200.2 $\pm$ 27.8 cd                                      | 51.4 $\pm$ 8.4 a       | 34.2 $\pm$ 3.1 a     | 277.6 $\pm$ 5.9 de    | 68.6 $\pm$ 8.7 ab     | 0.1 $\pm$ 0.0 a      |                      |                     |                     |
| Kaempferol-3-O-diglucoside-7-O-glucoside         | 177.3 $\pm$ 20.2 bd                                      | 209.2 $\pm$ 9.4 cdf    | 171.0 $\pm$ 2.3 bd   | 280.6 $\pm$ 8.5 fg    | 237.2 $\pm$ 22.2 dg   | 54.6 $\pm$ 2.1 a     |                      |                     |                     |
| Gluconapin                                       | 273.4 $\pm$ 13.6 g                                       | 165.8 $\pm$ 4.7 de     | 126.0 $\pm$ 3.5 cd   | 324.0 $\pm$ 9.8 h     | 170.9 $\pm$ 18.2 de   | 49.7 $\pm$ 3.5 a     |                      |                     |                     |
| Kaempferol-3-O-caffeoyldiglucoside-7-O-glucoside | 583.0 $\pm$ 17.2 de                                      | 599.4 $\pm$ 12.6 de    | 508.1 $\pm$ 5.9 cd   | 926.2 $\pm$ 42.7 g    | 551.1 $\pm$ 11.6 de   | 211.7 $\pm$ 10.0 a   |                      |                     |                     |
| Kaempferol-3-O-sinapoyldiglucoside-7-O-glucoside | 265.8 $\pm$ 11.7 ce                                      | 270.5 $\pm$ 7.3 ce     | 259.5 $\pm$ 5.1 bce  | 341.9 $\pm$ 7.7 e     | 226.5 $\pm$ 4.8 bce   | 119.5 $\pm$ 4.4 ab   |                      |                     |                     |
| Kaempferol diglucoside                           | 32.8 $\pm$ 1.6 e                                         | 35.6 $\pm$ 0.6 ef      | 19.3 $\pm$ 0.2 cd    | 59.5 $\pm$ 1.7 i      | 31.0 $\pm$ 0.7 e      | 8.3 $\pm$ 0.5 a      |                      |                     |                     |
| Sinapoylglycoside                                | 16.5 $\pm$ 0.8 e                                         | 17.9 $\pm$ 0.3 ef      | 9.7 $\pm$ 0.1 cd     | 29.9 $\pm$ 0.9 i      | 15.6 $\pm$ 0.3 e      | 4.2 $\pm$ 0.2 a      |                      |                     |                     |
| Isorhamnetin-3-O-glucoside-7-O-glucoside         | 78.2 $\pm$ 3.0 ef                                        | 78.4 $\pm$ 1.4 ef      | 71.7 $\pm$ 1.0 de    | 87.5 $\pm$ 2.3 fg     | 63.9 $\pm$ 1.0 cd     | 35.3 $\pm$ 1.5 a     |                      |                     |                     |
| Kaempferol-3-O-feruoylglycoside-7-O-glucoside    | 84.3 $\pm$ 3.2 ef                                        | 84.6 $\pm$ 1.5 ef      | 77.3 $\pm$ 1.0 de    | 94.4 $\pm$ 2.5 fg     | 69.0 $\pm$ 1.1 cd     | 38.1 $\pm$ 1.6 a     |                      |                     |                     |
| Caffeoylmalate                                   | 42.9 $\pm$ 1.4 a                                         | 79.7 $\pm$ 3.4 ce      | 85.6 $\pm$ 4.6 de    | 56.5 $\pm$ 2.0 ac     | 81.8 $\pm$ 3.7 ce     | 64.9 $\pm$ 4.0 acd   |                      |                     |                     |
| Hydroxyferuoylmalate                             | 14.5 $\pm$ 0.6 a                                         | 18.4 $\pm$ 2.6 ab      | 22.1 $\pm$ 0.7 acd   | 9.4 $\pm$ 0.2 a       | 36.2 $\pm$ 3.0 ce     | 23.4 $\pm$ 2.0 acd   |                      |                     |                     |
| Kaempferol hexoside derivative                   | 38.8 $\pm$ 6.4 ad                                        | 15.2 $\pm$ 3.8 a       | 24.6 $\pm$ 3.3 ab    | 59.4 $\pm$ 10.9 d     | 39.4 $\pm$ 5.5 ad     | 10.1 $\pm$ 4.4 a     |                      |                     |                     |

|                                    |                   |                  |                  |                   |                  |                 |
|------------------------------------|-------------------|------------------|------------------|-------------------|------------------|-----------------|
| Coumaroylmalate                    | 145.7 ± 3.3 bcd   | 191.7 ± 6.1 de   | 181.0 ± 6.4 ce   | 223.0 ± 10.1 ef   | 143.5 ± 12.7 ac  | 125.4 ± 5.9 ab  |
| Sinapoylmalate                     | 616.4 ± 18.8 b    | 708.2 ± 7.5 b    | 625.3 ± 14.8 b   | 955.9 ± 22.5 d    | 624.1 ± 13.0 b   | 419.5 ± 22.4 a  |
| Feruloylmalate                     | 193.6 ± 5.3 g     | 45.0 ± 1.2 bc    | 46.5 ± 1.3 bc    | 239.0 ± 4.1 hi    | 32.0 ± 1.1 ab    | 9.1 ± 1.6 a     |
| <b>Total hydroxycinnamic acids</b> | 1229.8 ± 52.5 de  | 1112.2 ± 14.6 ce | 1004.3 ± 27.0 cd | 1791.3 ± 38.5 h   | 1001.7 ± 35.0 cd | 646.6 ± 35.6 a  |
| <b>Total flavonols</b>             | 1260.1 ± 59.8 f   | 1292.9 ± 35.6 fg | 1131.5 ± 13.2 ef | 1849.4 ± 62.9 h   | 1218.1 ± 45.3 f  | 477.6 ± 22.9 a  |
| <b>TAPC</b>                        | 2763.4 ± 125.2 de | 2570.9 ± 51.5 cd | 2261.8 ± 43.2 c  | 3964.7 ± 106.9 hi | 2390.7 ± 82.9 cd | 1173.8 ± 61.5 a |

Data are means ±standard error.

Means followed by different letters within rows are significantly different (p <0.05).

TAPC, total analysed phenolics content.

K1: extraction medium control (0.17% DMSO, 0.17% ethanol in H<sub>2</sub>O); K2: water control.

Young leaves, undeveloped leaves; semi-old leaves, remaining fully developed leaves; old leaves, four outer fully developed leaves.

**Table S4.** Individual compounds quantified in *Lactuca sativa* L.

| Phenolic compound                              | Quantification according to treatment (mg/kg dry weight) |                    |                    |                    |                     |                   |                   |                  |                   |
|------------------------------------------------|----------------------------------------------------------|--------------------|--------------------|--------------------|---------------------|-------------------|-------------------|------------------|-------------------|
|                                                | Control juglone                                          |                    |                    |                    |                     |                   | Leaf juglone      |                  |                   |
|                                                | 1 mM                                                     |                    |                    | 10 μM              |                     |                   | 10 μM             |                  |                   |
|                                                | Young leaves                                             | Semi-old leaves    | Old leaves         | Young leaves       | Semi-old leaves     | Old leaves        | Young leaves      | Semi-old leaves  | Old leaves        |
| Dihydroxybenzoic acid hexoside                 | 662.3 ± 75.8 d                                           | 253.4 ± 9.8 b      | 535.0 ± 26.1 c     | 52.4 ± 4.0 a       | 39.0 ± 7.0 a        | 91.3 ± 3.3 a      | 86.4 ± 2.4 a      | 34.8 ± 0.4 a     | 37.6 ± 1.3 a      |
| Esculetin glucoside                            | 39.2 ± 4.2 ab                                            | 55.0 ± 1.0 ab      | 69.8 ± 12.7 ac     | 74.2 ± 14.5 ac     | 103.8 ± 11.8 c      | 47.8 ± 15.5 ab    | 29.5 ± 11.8 a     | 42.1 ± 2.5 ab    | 81.0 ± 3.3 bc     |
| Chlorogenic acid (5-caffeoylquinic acid)       | 744.7 ± 58.4 a                                           | 1437.7 ± 70.8 c    | 1515.8 ± 59.8 cd   | 1095.7 ± 42.2 b    | 2228.3 ± 45.8 e     | 2241.3 ± 37.4 e   | 527.2 ± 25.1 a    | 1032.8 ± 10.7 b  | 1703.2 ± 33.0 cd  |
| Galloyl hexoside                               | 72.9 ± 10.4 a                                            | 187.1 ± 4.6 ef     | 226.9 ± 27.7 f     | 106.9 ± 4.3 ab     | 200.1 ± 15.8 ef     | 129.4 ± 14.0ad    | 84.1 ± 12.9 a     | 117.2 ± 5.1 ad   | 167.1 ± 4.8 cde   |
| Cryptochlorogenic acid (4-caffeoylquinic acid) | 676.7 ± 49.1 f                                           | 1778.4 ± 75.7 h    | 1341.9 ± 27.1 g    | 508.9 ± 16.1 e     | 503.4 ± 20.8 de     | 167.5 ± 13.4 a    | 358.9 ± 30.1 cd   | 158.9 ± 3.2 a    | 166.6 ± 2.3 a     |
| Sinapoyl hexoside derivative                   | 0.6 ± 0.4 a                                              | 3.8 ± 0.2 ab       | 18.7 ± 5.4 cde     | 1.4 ± 0.1 ab       | 22.5 ± 1.8 df       | 8.8 ± 2.3 abc     | 2.1 ± 1.0 ab      | 4.7 ± 0.8 ab     | 25.1 ± 1.2 ef     |
| p-Coumaroylquinic acid 1                       | 0.2 ± 0.1 a                                              | 2.3 ± 0.5 ab       | 8.5 ± 1.0 ac       | 0.3 ± 0.0 a        | 2.6 ± 0.5 ab        | 13.8 ± 2.7 bc     | 2.1 ± 0.5 ab      | 2.9 ± 0.9 ab     | 36.8 ± 7.6 d      |
| p-Coumaroylquinic acid 2                       | 24.7 ± 3.3 ac                                            | 32.8 ± 1.3 bcd     | 50.4 ± 1.6 de      | 43.6 ± 1.4 ce      | 53.4 ± 0.5 e        | 32.8 ± 0.9 bcd    | 12.2 ± 0.4 a      | 20.2 ± 1.6 ab    | 42.0 ± 5.8 ce     |
| Caffeoylmalic acid                             | 85.0 ± 8.1 ab                                            | 98.9 ± 4.3 ac      | 190.5 ± 5.2 ef     | 158.0 ± 5.7 cde    | 226.7 ± 4.6 f       | 155.1 ± 2.6 cde   | 46.3 ± 1.6 a      | 159.1 ± 2.5 cde  | 380.2 ± 9.8 g     |
| Quercetin-3- <i>O</i> -galactoside             | 81.0 ± 7.5 e                                             | 26.1 ± 6.0 abc     | 84.1 ± 6.1 e       | 51.7 ± 2.3 cd      | 35.5 ± 4.0 bd       | 136.4 ± 11.8 f    | 27.2 ± 6.7 ad     | 8.2 ± 0.9 a      | 34.8 ± 0.9 ad     |
| Quercetin-3- <i>O</i> -glucoside               | 111.4 ± 9.3 ac                                           | 205.7 ± 19.3 dg    | 235.9 ± 12.5 fg    | 160.0 ± 2.2 bedef  | 162.5 ± 14.7 bcd    | 426.0 ± 20.9 h    | 405.1 ± 15.9 h    | 171.2 ± 5.5 cdef | 128.9 ± 3.4 ad    |
| Kaempferol-3- <i>O</i> -glucuronoside          | 336.7 ± 23.9 bc                                          | 662.3 ± 35.4 gh    | 640.1 ± 23.7 fg    | 472.3 ± 14.0 de    | 462.6 ± 12.5 de     | 763.3 ± 17.3 h    | 1153.1 ± 38.2 i   | 547.9 ± 11.7 ef  | 317.7 ± 12.0 ac   |
| Quercetin-3- <i>O</i> -glucuronide             | 200.4 ± 16.4 bc                                          | 377.6 ± 22.0 f     | 482.1 ± 17.2 g     | 280.0 ± 9.6 de     | 493.8 ± 10.7 g      | 802.3 ± 15.4 h    | 361.6 ± 11.7 f    | 189.3 ± 5.9 bc   | 193.6 ± 6.6 bc    |
| Quercetin 3-(6"-malonylglucoside)              | 788.6 ± 57.7 b                                           | 1512.3 ± 82.1 de   | 1779.1 ± 57.3 ef   | 1118.8 ± 39.8bc    | 1927.8 ± 48.8 f     | 3572.4 ± 74.8 g   | 1207.4 ± 50.7 c   | 795.2 ± 30.0 b   | 538.4 ± 17.8 ab   |
| Quercetin-3-(6"-acetylglucoside)               | 40.0 ± 2.3 a                                             | 92.2 ± 4.4 ab      | 135.9 ± 9.9 ac     | 54.7 ± 4.0 a       | 123.3 ± 12.2 ac     | 628.2 ± 56.0 e    | 70.6 ± 11.9 a     | 257.6 ± 24.8 cd  | 389.1 ± 40.2 d    |
| Caffeoyltartaric acid hexoside 1               | 814.6 ± 67 a                                             | 895.1 ± 86.1 ab    | 1408.8 ± 53.7 acd  | 1951.9 ± 16.1 ce   | 1674.5 ± 565.0 bcd  | 2788.4 ± 134.0 e  | 2226.9 ± 126.0 de | 1223.7 ± 60.1 ac | 831.5 ± 44.3 ab   |
| Caffeoyltartaric acid hexoside 2               | 59.3 ± 6.9 ab                                            | 23.8 ± 10.4 a      | 101.7 ± 6.1 ac     | 140.8 ± 23.0 acd   | 196.3 ± 35.0 ce     | 526.9 ± 52.4 f    | 184.1 ± 41.3 bce  | 105.0 ± 24.3 ac  | 142.0 ± 12.3 acd  |
| Total hydroxycinnamic acids                    | 2405.7 ± 192.7 a                                         | 4272.9 ± 216.7 bd  | 4636.2 ± 146.7 cde | 3900.7 ± 50.4 bc   | 4907.7 ± 545.0 cdef | 5934.5 ± 206.9 fg | 3359.8 ± 214.5 ab | 2707.3 ± 96.0 a  | 3327.3 ± 81.0 ab  |
| Total flavonols                                | 1558.0 ± 116.2 ac                                        | 2876.2 ± 156.3 fgh | 3357.2 ± 113.7 h   | 2137.5 ± 66.4 ce   | 3205.6 ± 86.0 gh    | 6328.5 ± 182.7 i  | 3225.0 ± 131.9 gh | 1969.3 ± 67.2 cd | 1602.5 ± 50.1 bc  |
| TAPC                                           | 4738.2 ± 397.3 a                                         | 7644.6 ± 372.9 cdf | 8825.0 ± 306.5 f   | 6271.7 ± 121.0 abc | 8456.2 ± 572.2 ef   | 12531.5 ± 383.4 g | 6784.8 ± 365.5 bd | 4870.7 ± 152.4 a | 5215.4 ± 105.3 ab |
|                                                |                                                          |                    |                    |                    |                     |                   |                   |                  |                   |
|                                                |                                                          |                    |                    |                    |                     |                   |                   |                  |                   |
|                                                |                                                          |                    |                    |                    |                     |                   |                   |                  |                   |
|                                                |                                                          |                    |                    |                    |                     |                   |                   |                  |                   |
|                                                |                                                          |                    |                    |                    |                     |                   |                   |                  |                   |
|                                                |                                                          |                    |                    |                    |                     |                   |                   |                  |                   |
|                                                |                                                          |                    |                    |                    |                     |                   |                   |                  |                   |
|                                                |                                                          |                    |                    |                    |                     |                   |                   |                  |                   |
|                                                |                                                          |                    |                    |                    |                     |                   |                   |                  |                   |
|                                                |                                                          |                    |                    |                    |                     |                   |                   |                  |                   |
|                                                |                                                          |                    |                    |                    |                     |                   |                   |                  |                   |
|                                                |                                                          |                    |                    |                    |                     |                   |                   |                  |                   |
|                                                |                                                          |                    |                    |                    |                     |                   |                   |                  |                   |
|                                                |                                                          |                    |                    |                    |                     |                   |                   |                  |                   |
|                                                |                                                          |                    |                    |                    |                     |                   |                   |                  |                   |
|                                                |                                                          |                    |                    |                    |                     |                   |                   |                  |                   |
|                                                |                                                          |                    |                    |                    |                     |                   |                   |                  |                   |
|                                                |                                                          |                    |                    |                    |                     |                   |                   |                  |                   |
|                                                |                                                          |                    |                    |                    |                     |                   |                   |                  |                   |
|                                                |                                                          |                    |                    |                    |                     |                   |                   |                  |                   |
|                                                |                                                          |                    |                    |                    |                     |                   |                   |                  |                   |
|                                                |                                                          |                    |                    |                    |                     |                   |                   |                  |                   |
|                                                |                                                          |                    |                    |                    |                     |                   |                   |                  |                   |
|                                                |                                                          |                    |                    |                    |                     |                   |                   |                  |                   |
|                                                |                                                          |                    |                    |                    |                     |                   |                   |                  |                   |
|                                                |                                                          |                    |                    |                    |                     |                   |                   |                  |                   |
|                                                |                                                          |                    |                    |                    |                     |                   |                   |                  |                   |
|                                                |                                                          |                    |                    |                    |                     |                   |                   |                  |                   |
|                                                |                                                          |                    |                    |                    |                     |                   |                   |                  |                   |
|                                                |                                                          |                    |                    |                    |                     |                   |                   |                  |                   |
|                                                |                                                          |                    |                    |                    |                     |                   |                   |                  |                   |
|                                                |                                                          |                    |                    |                    |                     |                   |                   |                  |                   |
|                                                |                                                          |                    |                    |                    |                     |                   |                   |                  |                   |
|                                                |                                                          |                    |                    |                    |                     |                   |                   |                  |                   |
|                                                |                                                          |                    |                    |                    |                     |                   |                   |                  |                   |
|                                                |                                                          |                    |                    |                    |                     |                   |                   |                  |                   |
|                                                |                                                          |                    |                    |                    |                     |                   |                   |                  |                   |
|                                                |                                                          |                    |                    |                    |                     |                   |                   |                  |                   |
|                                                |                                                          |                    |                    |                    |                     |                   |                   |                  |                   |
|                                                |                                                          |                    |                    |                    |                     |                   |                   |                  |                   |
|                                                |                                                          |                    |                    |                    |                     |                   |                   |                  |                   |
|                                                |                                                          |                    |                    |                    |                     |                   |                   |                  |                   |
|                                                |                                                          |                    |                    |                    |                     |                   |                   |                  |                   |
|                                                |                                                          |                    |                    |                    |                     |                   |                   |                  |                   |
|                                                |                                                          |                    |                    |                    |                     |                   |                   |                  |                   |
|                                                |                                                          |                    |                    |                    |                     |                   |                   |                  |                   |
|                                                |                                                          |                    |                    |                    |                     |                   |                   |                  |                   |
|                                                |                                                          |                    |                    |                    |                     |                   |                   |                  |                   |
|                                                |                                                          |                    |                    |                    |                     |                   |                   |                  |                   |
|                                                |                                                          |                    |                    |                    |                     |                   |                   |                  |                   |
|                                                |                                                          |                    |                    |                    |                     |                   |                   |                  |                   |
|                                                |                                                          |                    |                    |                    |                     |                   |                   |                  |                   |
|                                                |                                                          |                    |                    |                    |                     |                   |                   |                  |                   |
|                                                |                                                          |                    |                    |                    |                     |                   |                   |                  |                   |
|                                                |                                                          |                    |                    |                    |                     |                   |                   |                  |                   |
|                                                |                                                          |                    |                    |                    |                     |                   |                   |                  |                   |
|                                                |                                                          |                    |                    |                    |                     |                   |                   |                  |                   |
|                                                |                                                          |                    |                    |                    |                     |                   |                   |                  |                   |
|                                                |                                                          |                    |                    |                    |                     |                   |                   |                  |                   |
|                                                |                                                          |                    |                    |                    |                     |                   |                   |                  |                   |
|                                                |                                                          |                    |                    |                    |                     |                   |                   |                  |                   |
|                                                |                                                          |                    |                    |                    |                     |                   |                   |                  |                   |
|                                                |                                                          |                    |                    |                    |                     |                   |                   |                  |                   |
|                                                |                                                          |                    |                    |                    |                     |                   |                   |                  |                   |
|                                                |                                                          |                    |                    |                    |                     |                   |                   |                  |                   |
|                                                |                                                          |                    |                    |                    |                     |                   |                   |                  |                   |
|                                                |                                                          |                    |                    |                    |                     |                   |                   |                  |                   |
|                                                |                                                          |                    |                    |                    |                     |                   |                   |                  |                   |
|                                                |                                                          |                    |                    |                    |                     |                   |                   |                  |                   |
|                                                |                                                          |                    |                    |                    |                     |                   |                   |                  |                   |
|                                                |                                                          |                    |                    |                    |                     |                   |                   |                  |                   |
|                                                |                                                          |                    |                    |                    |                     |                   |                   |                  |                   |
|                                                |                                                          |                    |                    |                    |                     |                   |                   |                  |                   |
|                                                |                                                          |                    |                    |                    |                     |                   |                   |                  |                   |
|                                                |                                                          |                    |                    |                    |                     |                   |                   |                  |                   |
|                                                |                                                          |                    |                    |                    |                     |                   |                   |                  |                   |
|                                                |                                                          |                    |                    |                    |                     |                   |                   |                  |                   |
|                                                |                                                          |                    |                    |                    |                     |                   |                   |                  |                   |
|                                                |                                                          |                    |                    |                    |                     |                   |                   |                  |                   |
|                                                |                                                          |                    |                    |                    |                     |                   |                   |                  |                   |
|                                                |                                                          |                    |                    |                    |                     |                   |                   |                  |                   |
|                                                |                                                          |                    |                    |                    |                     |                   |                   |                  |                   |
|                                                |                                                          |                    |                    |                    |                     |                   |                   |                  |                   |
|                                                |                                                          |                    |                    |                    |                     |                   |                   |                  |                   |
|                                                |                                                          |                    |                    |                    |                     |                   |                   |                  |                   |
|                                                |                                                          |                    |                    |                    |                     |                   |                   |                  |                   |
|                                                |                                                          |                    |                    |                    |                     |                   |                   |                  |                   |
|                                                |                                                          |                    |                    |                    |                     |                   |                   |                  |                   |
|                                                |                                                          |                    |                    |                    |                     |                   |                   |                  |                   |
|                                                |                                                          |                    |                    |                    |                     |                   |                   |                  |                   |
|                                                |                                                          |                    |                    |                    |                     |                   |                   |                  |                   |
|                                                |                                                          |                    |                    |                    |                     |                   |                   |                  |                   |
|                                                |                                                          |                    |                    |                    |                     |                   |                   |                  |                   |
|                                                |                                                          |                    |                    |                    |                     |                   |                   |                  |                   |
|                                                |                                                          |                    |                    |                    |                     |                   |                   |                  |                   |
|                                                |                                                          |                    |                    |                    |                     |                   |                   |                  |                   |
|                                                |                                                          |                    |                    |                    |                     |                   |                   |                  |                   |
|                                                |                                                          |                    |                    |                    |                     |                   |                   |                  |                   |
|                                                |                                                          |                    |                    |                    |                     |                   |                   |                  |                   |
|                                                |                                                          |                    |                    |                    |                     |                   |                   |                  |                   |
|                                                |                                                          |                    |                    |                    |                     |                   |                   |                  |                   |
|                                                |                                                          |                    |                    |                    |                     |                   |                   |                  |                   |
|                                                |                                                          |                    |                    |                    |                     |                   |                   |                  |                   |
|                                                |                                                          |                    |                    |                    |                     |                   |                   |                  |                   |
|                                                |                                                          |                    |                    |                    |                     |                   |                   |                  |                   |
|                                                |                                                          |                    |                    |                    |                     |                   |                   |                  |                   |
|                                                |                                                          |                    |                    |                    |                     |                   |                   |                  |                   |
|                                                |                                                          |                    |                    |                    |                     |                   |                   |                  |                   |
|                                                |                                                          |                    |                    |                    |                     |                   |                   |                  |                   |
|                                                |                                                          |                    |                    |                    |                     |                   |                   |                  |                   |
|                                                |                                                          |                    |                    |                    |                     |                   |                   |                  |                   |
|                                                |                                                          |                    |                    |                    |                     |                   |                   |                  |                   |
|                                                |                                                          |                    |                    |                    |                     |                   |                   |                  |                   |
|                                                |                                                          |                    |                    |                    |                     |                   |                   |                  |                   |
|                                                |                                                          |                    |                    |                    |                     |                   |                   |                  |                   |
|                                                |                                                          |                    |                    |                    |                     |                   |                   |                  |                   |
|                                                |                                                          |                    |                    |                    |                     |                   |                   |                  |                   |
|                                                |                                                          |                    |                    |                    |                     |                   |                   |                  |                   |
|                                                |                                                          |                    |                    |                    |                     |                   |                   |                  |                   |
|                                                |                                                          |                    |                    |                    |                     |                   |                   |                  |                   |
|                                                |                                                          |                    |                    |                    |                     |                   |                   |                  |                   |
|                                                |                                                          |                    |                    |                    |                     |                   |                   |                  |                   |
|                                                |                                                          |                    |                    |                    |                     |                   |                   |                  |                   |
|                                                |                                                          |                    |                    |                    |                     |                   |                   |                  |                   |
|                                                |                                                          |                    |                    |                    |                     |                   |                   |                  |                   |
|                                                |                                                          |                    |                    |                    |                     |                   |                   |                  |                   |
|                                                |                                                          |                    |                    |                    |                     |                   |                   |                  |                   |
|                                                |                                                          |                    |                    |                    |                     |                   |                   |                  |                   |
|                                                |                                                          |                    |                    |                    |                     |                   |                   |                  |                   |
|                                                |                                                          |                    |                    |                    |                     |                   |                   |                  |                   |
|                                                |                                                          |                    |                    |                    |                     |                   |                   |                  |                   |
|                                                |                                                          |                    |                    |                    |                     |                   |                   |                  |                   |
|                                                |                                                          |                    |                    |                    |                     |                   |                   |                  |                   |
|                                                |                                                          |                    |                    |                    |                     |                   |                   |                  |                   |
|                                                |                                                          |                    |                    |                    |                     |                   |                   |                  |                   |
|                                                |                                                          |                    |                    |                    |                     |                   |                   |                  |                   |
|                                                |                                                          |                    |                    |                    |                     |                   |                   |                  |                   |
|                                                |                                                          |                    |                    |                    |                     |                   |                   |                  |                   |
|                                                |                                                          |                    |                    |                    |                     |                   |                   |                  |                   |
|                                                |                                                          |                    |                    |                    |                     |                   |                   |                  |                   |
|                                                |                                                          |                    |                    |                    |                     |                   |                   |                  |                   |
|                                                |                                                          |                    |                    |                    |                     |                   |                   |                  |                   |
|                                                |                                                          |                    |                    |                    |                     |                   |                   |                  |                   |
|                                                |                                                          |                    |                    |                    |                     |                   |                   |                  |                   |
|                                                |                                                          |                    |                    |                    |                     |                   |                   |                  |                   |
|                                                |                                                          |                    |                    |                    |                     |                   |                   |                  |                   |
|                                                |                                                          |                    |                    |                    |                     |                   |                   |                  |                   |
|                                                |                                                          |                    |                    |                    |                     |                   |                   |                  |                   |
|                                                |                                                          |                    |                    |                    |                     |                   |                   |                  |                   |
|                                                |                                                          |                    |                    |                    |                     |                   |                   |                  |                   |
|                                                |                                                          |                    |                    |                    |                     |                   |                   |                  |                   |
|                                                |                                                          |                    |                    |                    |                     |                   |                   |                  |                   |
|                                                |                                                          |                    |                    |                    |                     |                   |                   |                  |                   |
|                                                |                                                          |                    |                    |                    |                     |                   |                   |                  |                   |
|                                                |                                                          |                    |                    |                    |                     |                   |                   |                  |                   |
|                                                |                                                          |                    |                    |                    |                     |                   |                   |                  |                   |
|                                                |                                                          |                    |                    |                    |                     |                   |                   |                  |                   |
|                                                |                                                          |                    |                    |                    |                     |                   |                   |                  |                   |
|                                                |                                                          |                    |                    |                    |                     |                   |                   |                  |                   |
|                                                |                                                          |                    |                    |                    |                     |                   |                   |                  |                   |
|                                                |                                                          |                    |                    |                    |                     |                   |                   |                  |                   |
|                                                |                                                          |                    |                    |                    |                     |                   |                   |                  |                   |
|                                                |                                                          |                    |                    |                    |                     |                   |                   |                  |                   |
|                                                |                                                          |                    |                    |                    |                     |                   |                   |                  |                   |
|                                                |                                                          |                    |                    |                    |                     |                   |                   |                  |                   |
|                                                |                                                          |                    |                    |                    |                     |                   |                   |                  |                   |
|                                                |                                                          |                    |                    |                    |                     |                   |                   |                  |                   |
|                                                |                                                          |                    |                    |                    |                     |                   |                   |                  |                   |
|                                                |                                                          |                    |                    |                    |                     |                   |                   |                  |                   |
|                                                |                                                          |                    |                    |                    |                     |                   |                   |                  |                   |
|                                                |                                                          |                    |                    |                    |                     |                   |                   |                  |                   |
|                                                |                                                          |                    |                    |                    |                     |                   |                   |                  |                   |
|                                                |                                                          |                    |                    |                    |                     |                   |                   |                  |                   |
|                                                |                                                          |                    |                    |                    |                     |                   |                   |                  |                   |
|                                                |                                                          |                    |                    |                    |                     |                   |                   |                  |                   |
|                                                |                                                          |                    |                    |                    |                     |                   |                   |                  |                   |
|                                                |                                                          |                    |                    |                    |                     |                   |                   |                  |                   |
|                                                |                                                          |                    |                    |                    |                     |                   |                   |                  |                   |
|                                                |                                                          |                    |                    |                    |                     |                   |                   |                  |                   |
|                                                |                                                          |                    |                    |                    |                     |                   |                   |                  |                   |
|                                                |                                                          |                    |                    |                    |                     |                   |                   |                  |                   |
|                                                |                                                          |                    |                    |                    |                     |                   |                   |                  |                   |
|                                                |                                                          |                    |                    |                    |                     |                   |                   |                  |                   |
|                                                |                                                          |                    |                    |                    |                     |                   |                   |                  |                   |
|                                                |                                                          |                    |                    |                    |                     |                   |                   |                  |                   |
|                                                |                                                          |                    |                    |                    |                     |                   |                   |                  |                   |
|                                                |                                                          |                    |                    |                    |                     |                   |                   |                  |                   |
|                                                |                                                          |                    |                    |                    |                     |                   |                   |                  |                   |
|                                                |                                                          |                    |                    |                    |                     |                   |                   |                  |                   |
|                                                |                                                          |                    |                    |                    |                     |                   |                   |                  |                   |
|                                                |                                                          |                    |                    |                    |                     |                   |                   |                  |                   |
|                                                |                                                          |                    |                    |                    |                     |                   |                   |                  |                   |
|                                                |                                                          |                    |                    |                    |                     |                   |                   |                  |                   |
|                                                |                                                          |                    |                    |                    |                     |                   |                   |                  |                   |
|                                                |                                                          |                    |                    |                    |                     |                   |                   |                  |                   |
|                                                |                                                          |                    |                    |                    |                     |                   |                   |                  |                   |
|                                                |                                                          |                    |                    |                    |                     |                   |                   |                  |                   |
|                                                |                                                          |                    |                    |                    |                     |                   |                   |                  |                   |
|                                                |                                                          |                    |                    |                    |                     |                   |                   |                  |                   |
|                                                |                                                          |                    |                    |                    |                     |                   |                   |                  |                   |
|                                                |                                                          |                    |                    |                    |                     |                   |                   |                  |                   |
|                                                |                                                          |                    |                    |                    |                     |                   |                   |                  |                   |
|                                                |                                                          |                    |                    |                    |                     |                   |                   |                  |                   |
|                                                |                                                          |                    |                    |                    |                     |                   |                   |                  |                   |
|                                                |                                                          |                    |                    |                    |                     |                   |                   |                  |                   |
|                                                |                                                          |                    |                    |                    |                     |                   |                   |                  |                   |
|                                                |                                                          |                    |                    |                    |                     |                   |                   |                  |                   |
|                                                |                                                          |                    |                    |                    |                     |                   |                   |                  |                   |
|                                                |                                                          |                    |                    |                    |                     |                   |                   |                  |                   |
|                                                |                                                          |                    |                    |                    |                     |                   |                   |                  |                   |
|                                                |                                                          |                    |                    |                    |                     |                   |                   |                  |                   |
|                                                |                                                          |                    |                    |                    |                     |                   |                   |                  |                   |
|                                                |                                                          |                    |                    |                    |                     |                   |                   |                  |                   |
|                                                |                                                          |                    |                    |                    |                     |                   |                   |                  |                   |
|                                                |                                                          |                    |                    |                    |                     |                   |                   |                  |                   |
|                                                |                                                          |                    |                    |                    |                     |                   |                   |                  |                   |
|                                                |                                                          |                    |                    |                    |                     |                   |                   |                  |                   |

|                                       |                   |                    |                    |                   |                    |                   |
|---------------------------------------|-------------------|--------------------|--------------------|-------------------|--------------------|-------------------|
| Quercetin-3- <i>O</i> -galactoside    | 13.4 ± 2.9 sb     | 17.2 ± 1.4 ab      | 53.3 ± 2.5 d       | 14.5 ± 5.2 ab     | 11.6 ± 1.7 ab      | 51.8 ± 5.0 cd     |
| Quercetin-3- <i>O</i> -glucoside      | 257.0 ± 12.7 g    | 90.5 ± 2.0 ab      | 70.8 ± 7.2 a       | 403.8 ± 34.2 h    | 218.2 ± 23.1 eg    | 157.8 ± 8.2 bcde  |
| Kaempferol-3- <i>O</i> -glucuronoside | 720.8 ± 36.3 gh   | 245.2 ± 10.1 ab    | 212.1 ± 14.0 a     | 1104.4 ± 27.4 i   | 514.1 ± 11.8 e     | 382.7 ± 8.6 cd    |
| Quercetin-3- <i>O</i> -glucuronide    | 221.7 ± 11.4 bd   | 107.7 ± 2.8 a      | 146.4 ± 13.8 ab    | 895.9 ± 38.6 i    | 347.3 ± 12.6 ef    | 266.7 ± 3.2 cd    |
| Quercetin 3-(6"-malonylglucoside)     | 759.3 ± 35.8 b    | 455.9 ± 13.8 a     | 406.1 ± 30.9 a     | 3294.2 ± 111.1 a  | 1343.7 ± 62.8 g    | 794.1 ± 12.9 cd   |
| Quercetin-3-(6"-acetylglucoside)      | 46.5 ± 1.1 a      | 64.0 ± 12.3 a      | 269.9 ± 44.1 cd    | 229.1 ± 19.5 bc   | 234.7 ± 43.4 bc    | 714.6 ± 53.5 e    |
| Caffeoyltartaric acid hexoside 1      | 2744.3 ± 107.3 e  | 1542.6 ± 63.4 acd  | 1364.9 ± 92.7 ac   | 4460.6 ± 141.9 f  | 1825.5 ± 38.3 cd   | 1824.5 ± 31.8 cd  |
| Caffeoyltartaric acid hexoside 2      | 134.3 ± 7.6 acd   | 106.9 ± 4.5 ac     | 96.8 ± 14.5 ac     | 302.9 ± 7.8 e     | 108.7 ± 34.4 ac    | 236.5 ± 22.0 de   |
| <b>Total hydroxycinnamic acids</b>    | 4260.5 ± 180.3 bd | 4542.4 ± 152.7 cde | 5349.6 ± 242.8 def | 6676.6 ± 215.7 g  | 5294.9 ± 158.4 def | 5639.2 ± 115.8 eg |
| <b>Total flavonols</b>                | 2018.7 ± 94.9 cd  | 980.5 ± 29.2 a     | 1158.7 ± 105.4 ab  | 5941.9 ± 227.0 i  | 2669.6 ± 120.0 eg  | 2367.7 ± 77.2 def |
| <b>TAPC</b>                           | 6522.2 ± 260.7 bc | 5825.3 ± 184.0 ab  | 6818.0 ± 333.7 bde | 12899.0 ± 445.1 g | 8276.4 ± 287.1 df  | 8362.8 ± 189.2 df |

Data are means ±standard error.

Means followed by different letters within rows are significantly different (p <0.05).

TAPC, total analysed phenolics content.

K1: extraction medium control (0.17% DMSO, 0.17% ethanol in H<sub>2</sub>O); K2: water control.

Young leaves, undeveloped leaves; semi-old leaves, remaining fully developed leaves; old leaves, four outer fully developed leaves.

**Table S5.** Individual compounds quantified in *Valerianella locusta* Laterr.

| Phenolic compound                              | Quantification according to treatment (mg/kg dry weight) |                   |                   |                    |                    |                   |                   |                    |                    |
|------------------------------------------------|----------------------------------------------------------|-------------------|-------------------|--------------------|--------------------|-------------------|-------------------|--------------------|--------------------|
|                                                | Control juglone                                          |                   |                   |                    |                    |                   | Leaf juglone      |                    |                    |
|                                                | 1 mM                                                     |                   |                   | 10 µM              |                    |                   | 10 µM             |                    |                    |
|                                                | Young leaves                                             | Semi-old leaves   | Old leaves        | Young leaves       | Semi-old leaves    | Old leaves        | Young leaves      | Semi-old leaves    | Old leaves         |
| 4-Hydroxyphenylaoyl glucoside derivative       | 178.7 ± 11.4 a                                           | 958.0 ± 36.0 c    | 2673.7 ± 72.0 d   | 172.9 ± 3.9 a      | 366.1 ± 7.6 b      | 917.8 ± 17.7 c    | 134.2 ± 1.4 a     | 123.7 ± 5.1 a      | 126.7 ± 5.3 a      |
| Chlorogenic acid (5-caffeoylquinic acid)       | 6340.9 ± 172.2 ab                                        | 7458.2 ± 301.8 ce | 8727.8 ± 343.1 f  | 5949.2 ± 154.7 ab  | 11243.8 ± 291.3 g  | 16895.5 ± 117.4 h | 6151.3 ± 9.1 ab   | 6635.3 ± 106.5 ac  | 8884.2 ± 272.1 f   |
| Cryptochlorogenic acid (4-caffeoylquinic acid) | 354.1 ± 8.6 de                                           | 325.4 ± 13.0 cd   | 347.8 ± 22.7 ce   | 256.8 ± 7.1 ac     | 424.8 ± 17.5 e     | 523.1 ± 6.5 f     | 215.0 ± 1.1 a     | 223.9 ± 23.6 ab    | 302.1 ± 40.3 acd   |
| <i>cis</i> 5-O-p-Coumaroylquinic acid          | 18.2 ± 0.7 ab                                            | 10.6 ± 0.6 a      | 38.0 ± 5.8 bcd    | 18.1 ± 0.6 ab      | 38.7 ± 2.3 bcd     | 63.2 ± 1.9 e      | 11.1 ± 0.1 a      | 28.7 ± 3.2 ac      | 42.7 ± 7.5 ce      |
| <i>cis</i> 5-O-Feruoylquinic acid              | 14.7 ± 0.4 ab                                            | 29.5 ± 3.3 bd     | 46.2 ± 7.1 d      | 9.2 ± 1.0 a        | 46.2 ± 7.3 d       | 43.8 ± 0.5 d      | 9.1 ± 0.3 a       | 17.0 ± 0.8 ab      | 39.1 ± 4.6 cd      |
| <i>trans</i> 5-O-p-Coumaroylquinic acid        | 9.7 ± 0.5 a                                              | 20.1 ± 0.8 ac     | 42.6 ± 4.5 ef     | 14.1 ± 0.9 ab      | 25.4 ± 2.7 bcd     | 52.1 ± 1.0 f      | 16.0 ± 0.2 ab     | 18.8 ± 0.5 ab      | 34.1 ± 1.2 de      |
| <i>trans</i> 5-O-Feruoylquinic acid            | 13.9 ± 1.5 a                                             | 21.1 ± 0.9 ab     | 62.0 ± 12.9 c     | 10.3 ± 1.5 a       | 24.7 ± 4.8 ab      | 28.4 ± 0.5 ab     | 8.1 ± 1.0 a       | 10.6 ± 0.2 a       | 42.8 ± 6.9 bc      |
| Luteolin-7-rutinoside                          | 143.7 ± 22.7 a                                           | 132.2 ± 11.5 a    | 517.1 ± 43.7 c    | 240.8 ± 38.6 a     | 294.2 ± 51.7 ab    | 323.3 ± 6.7 ac    | 200.5 ± 12.9 a    | 153.4 ± 5.2 a      | 237.8 ± 65.4 a     |
| Diosmetin apiosylglucoside                     | 2487.4 ± 90.1 b                                          | 1563.5 ± 87.3 a   | 2839.2 ± 68.8 be  | 4171.8 ± 62.3 f    | 3096.5 ± 75.2 cde  | 2722.0 ± 60.9 bd  | 5103.4 ± 30.3 g   | 2949.8 ± 133.6 be  | 2594.5 ± 87.5 b    |
| Diosmin (diosmetin-7-O-rutinoside)             | 3401.8 ± 113.5 bc                                        | 2364.9 ± 107.6 a  | 3472.0 ± 93.2 bc  | 7014.7 ± 107.5 f   | 4923.5 ± 77.3 d    | 3456.3 ± 38.6 bc  | 7540.8 ± 47.4 g   | 3293.1 ± 37.7 bc   | 3096.9 ± 84.6 b    |
| Dicaffeoylquinic acid                          | 827.1 ± 18.9 a                                           | 809.3 ± 34.4 a    | 1711.8 ± 48.0 gh  | 973.8 ± 19.9 ab    | 1448.6 ± 53.3 ef   | 1849.1 ± 23.5 h   | 1345.5 ± 17.8 de  | 1309.2 ± 13.9 ce   | 1743.3 ± 53.7 gh   |
| Apigenin-rutinoside                            | 95.6 ± 12.2 a                                            | 103.0 ± 14.0 a    | 619.4 ± 64.1 f    | 168.2 ± 10.9 ac    | 241.4 ± 23.2 bcd   | 699.7 ± 6.0 f     | 184.7 ± 11.9 ac   | 181.5 ± 21.1 ac    | 281.9 ± 11.2 cd    |
| Caffeic acid hexoside derivative               | 269.2 ± 11.5 e                                           | 158.4 ± 7.2 ab    | 262.3 ± 8.2 e     | 429.2 ± 10.5 f     | 268.2 ± 8.6 e      | 163.2 ± 1.5 bc    | 544.4 ± 3.0 g     | 204.1 ± 3.7 d      | 122.7 ± 3.6 a      |
| <b>Total hydroxycinnamic acids</b>             | 7847.8 ± 204.0 a                                         | 8832.6 ± 351.2 ac | 11238.4 ± 441.8 d | 7660.7 ± 170.2 a   | 13520.5 ± 361.9 e  | 19618.4 ± 148.7 f | 8300.5 ± 24.0 ab  | 8447.5 ± 106.6 ab  | 11211.0 ± 370.0 d  |
| <b>Total flavones</b>                          | 6128.6 ± 149.8 b                                         | 4163.5 ± 183.5 a  | 7447.7 ± 186.9 cd | 11595.5 ± 119.3 f  | 8555.6 ± 215.3 e   | 7201.3 ± 102.8 cd | 13029.4 ± 77.5 g  | 6577.9 ± 146.8 bc  | 6211.0 ± 207.9 b   |
| <b>TAPC</b>                                    | 14155.1 ± 355.6 a                                        | 13954.1 ± 559.6 a | 21359 ± 696.9 fg  | 19429.2 ± 186.1 ef | 22442.2 ± 560.2 gh | 27737.4 ± 260.8 j | 21464.0 ± 99.9 fg | 15149.0 ± 197.6 ab | 17548.8 ± 566.3 ce |

| K1                                             |                  |                   | K2                |                    |                    |
|------------------------------------------------|------------------|-------------------|-------------------|--------------------|--------------------|
| 4-Hydroxyphenylaoyl glucoside derivative       | 103.0 ± 2.0 a    | 107.8 ± 1.9 a     | 94.3 ± 4.8 a      | 146.4 ± 8.3 a      | 99.0 ± 4.9 a       |
| Chlorogenic acid (5-caffeoylquinic acid)       | 5775.3 ± 119.5 a | 7682.9 ± 181.4 de | 8137.2 ± 246.2 ef | 6654.8 ± 143.1 acd | 6843.3 ± 136.5 bcd |
| Cryptochlorogenic acid (4-caffeoylquinic acid) | 255.8 ± 5.9 ac   | 299.0 ± 34.6 acd  | 313.6 ± 17.7 bcd  | 289.2 ± 9.3 acd    | 257.3 ± 3.5 ac     |
| <i>cis</i> 5-O-p-Coumaroylquinic acid          | 20.5 ± 6.3 ac    | 27.1 ± 4.8 ac     | 55.2 ± 9.6 de     | 12.8 ± 2.8 a       | 10.1 ± 0.9 a       |
| <i>cis</i> 5-O-Feruoylquinic acid              | 11.0 ± 3.3 ab    | 22.0 ± 1.4 abc    | 39.2 ± 5.2 cd     | 6.6 ± 1.1 a        | 15.1 ± 0.5 ab      |
| <i>trans</i> 5-O-p-Coumaroylquinic acid        | 16.3 ± 3.6 ab    | 21.3 ± 0.9 ac     | 32.0 ± 5.5 ce     | 11.4 ± 2.6 a       | 13.5 ± 0.4 ab      |
| <i>trans</i> 5-O-Feruoylquinic acid            | 15.0 ± 2.7 ab    | 13.4 ± 0.4 a      | 59.9 ± 12.3 c     | 12.0 ± 3.5 a       | 10.6 ± 1.4 a       |
| Luteolin-7-rutinoside                          | 279.2 ± 24.5 a   | 179.4 ± 5.8 a     | 739.3 ± 71.4 d    | 308.2 ± 16.1 ab    | 181.7 ± 52.8 a     |
| Diosmetin apiosylglucoside                     | 4200.6 ± 77.1 f  | 2670.8 ± 84.3 bc  | 3209.3 ± 178.3 e  | 5927.2 ± 102.5 h   | 3146.7 ± 72.1 de   |
| Diosmin (diosmetin-7-O-rutinoside)             | 6344.2 ± 130.0 e | 3045.0 ± 40.4 b   | 3707.8 ± 111.9 c  | 8483.7 ± 109.8 h   | 4552.0 ± 87.0 d    |

|                                    |                       |                       |                       |                    |                     |                   |
|------------------------------------|-----------------------|-----------------------|-----------------------|--------------------|---------------------|-------------------|
| Dicaffeoylquinic acid              | 1346.2 ± 25.1 de      | 1116.0 ± 45.4 bc      | 1193.5 ± 67.6 cd      | 1434.6 ± 34.7 ef   | 1612.8 ± 45.4 fg    | 2705.2 ± 44.0 i   |
| Apigenin-rutinoside                | 167.5 ± 17.9 ac       | 134.4 ± 21.4 ab       | 445.5 ± 36.3 e        | 167.4 ± 12.5 ac    | 198.5 ± 11.9 ac     | 360.6 ± 16.9 de   |
| Caffeic acid hexoside derivative   | 424.8 ± 10.7 f        | 155.8 ± 8.3 ab        | 202.7 ± 10.6 cd       | 419.1 ± 11.3 f     | 158.2 ± 3.8 ab      | 165.6 ± 3.3 bd    |
| <b>Total hydroxycinnamic acids</b> | 7864.9 ± 167.0 a      | 9337.5 ± 253.0 bc     | 10033.3 ± 353.6<br>cd | 8840.4 ± 182.8 ac  | 8920.8 ± 189.2 ac   | 14138.9 ± 257.5 e |
| <b>Total flavones</b>              | 10991.6 ± 235.5 f     | 6029.5 ± 107.3 b      | 8101.9 ± 383.0 de     | 14886.6 ± 209.4 h  | 8078.9 ± 211.2 de   | 10758.0 ± 164.9 f |
| <b>TAPC</b>                        | 18959.6 ± 393.1<br>de | 15474.8 ± 334.3<br>ac | 18229.6 ± 734.2<br>de | 23873.4 ± 363.4 hi | 17098.7 ± 396.5 bcd | 24997.2 ± 421.5 i |

Data are means ±standard error.

Means followed by different letters within rows are significantly different (p <0.05).

TAPC, total analysed phenolics content.

K1: extraction medium control (0.17% DMSO, 0.17% ethanol in H<sub>2</sub>O); K2: water control.

Young leaves, undeveloped leaves; semi-old leaves, remaining fully developed leaves; old leaves, four outer fully developed leaves.
